# Supplementary material
Source: PubMed Central journal article supplement (PMC8026678)

**Figure S1. Effect of withaferin A (WA) treatment on breast cancer stemness-related genes in MCF-7 and MDA-MB-231 cells.** **A**, RNA-seq analysis revealed suppression of *ABCG2*, *CHEK1*, and *IL-8* expression following 16-hours of treatment with 2  $\mu\text{mol/L}$  WA in MCF-7 and MDA-MB-231 cells (31). The results shown are mean  $\pm$  SD (n=3). **B**, RNA-seq analysis for expression of breast cancer stemness genes whose expression was decreased significantly by WA treatment in either MCF-7 or MDA-MB-231 cells (31). The results shown are mean  $\pm$  SD (n=3). \*Significantly different ( $P < 0.05$ ) compared with control by unpaired Student's *t* test.

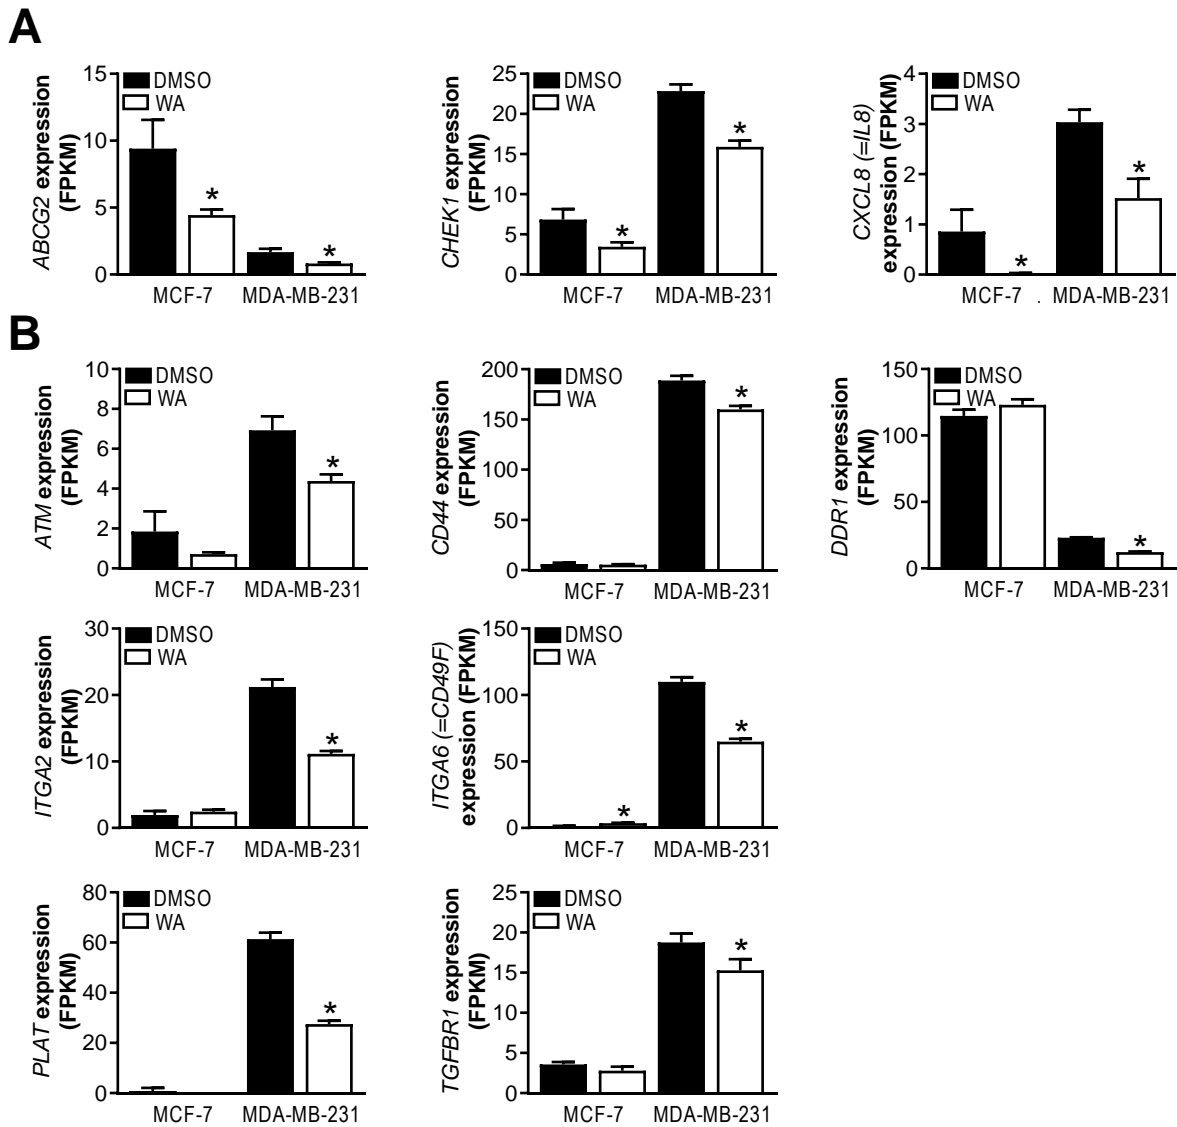

Supplement: NIHMS1667657-supplement-1.pdf [file NIHMS1667657-supplement-1.pdf]
